# Supplementary material
Source: Frontiers journal article supplement (https://www.frontiersin.org/articles/428319)

## **SUPPLEMENTAL METHODS**

**Platelet aggregation.** Washed platelets were pre-incubated with 0.01% DMSO or 100 µg/ml HRT for 10 minutes for at 37 °C and then stimulated with thrombin (0.2 U/ml), CRP (2 µg/ml), ADP (30 µM), and U46619 (10 µM). Platelet aggregation was monitored in a platelet aggregometer (Chronolog Corp, Havertown, PA) at 37 °C with stirring (1,000 rpm).

## **SUPPLEMENTAL FIGURE LEGENDS**

**Figure S1. HRT does not regulate platelet aggregation induced by a high concentration of thrombin, CRP, ADP, or U46619.** Platelet aggregation of 0.01% DMSO or 100 µg/ml HRT pretreated platelets were induced by stimulation with 0.2 U/ml Thrombin (A), 2 µg/ml CRP (B), 30 µM ADP (C), and 10 µM U46619 (D).

# Figure S1

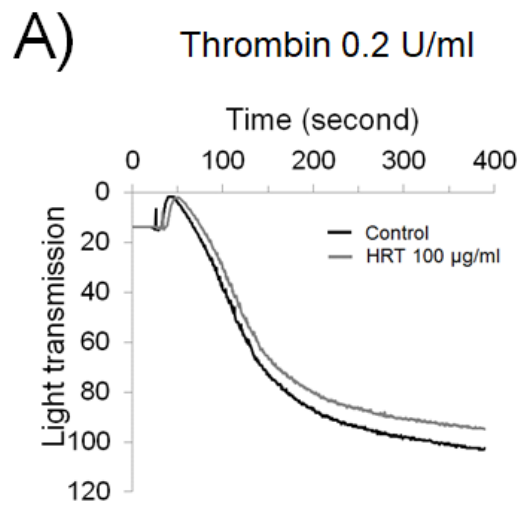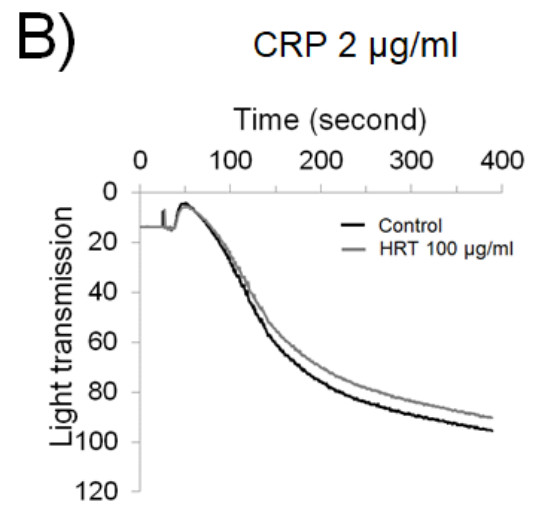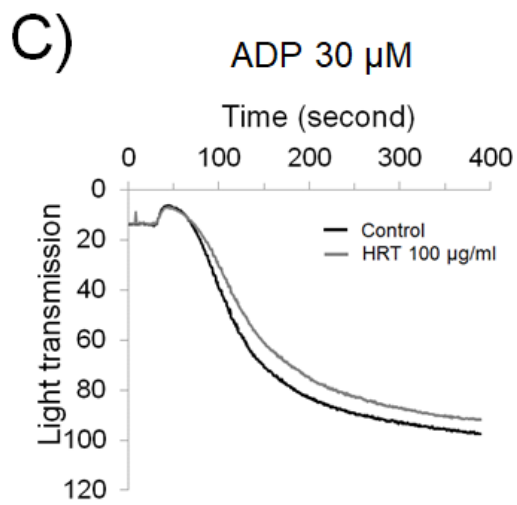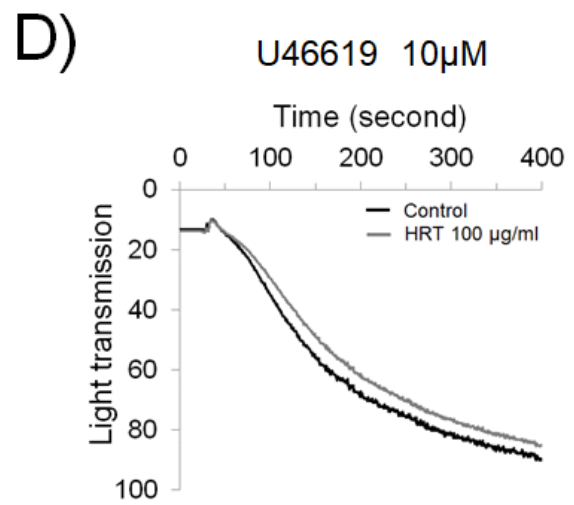

Supplement: Data_Sheet_1.PDF [file Data_Sheet_1.PDF]
